# Supplementary material for: A Drosophila model of oral peptide therapeutics for adult intestinal stem cell tumors
Source: PubMed Central journal article supplement (PMC7390633; doi:10.1242/dmm.044420), 2020-07-24
Supplement: dmm-13-044420-s1.pdf [file dmm-13-044420-s1.pdf]

FIGURE S1

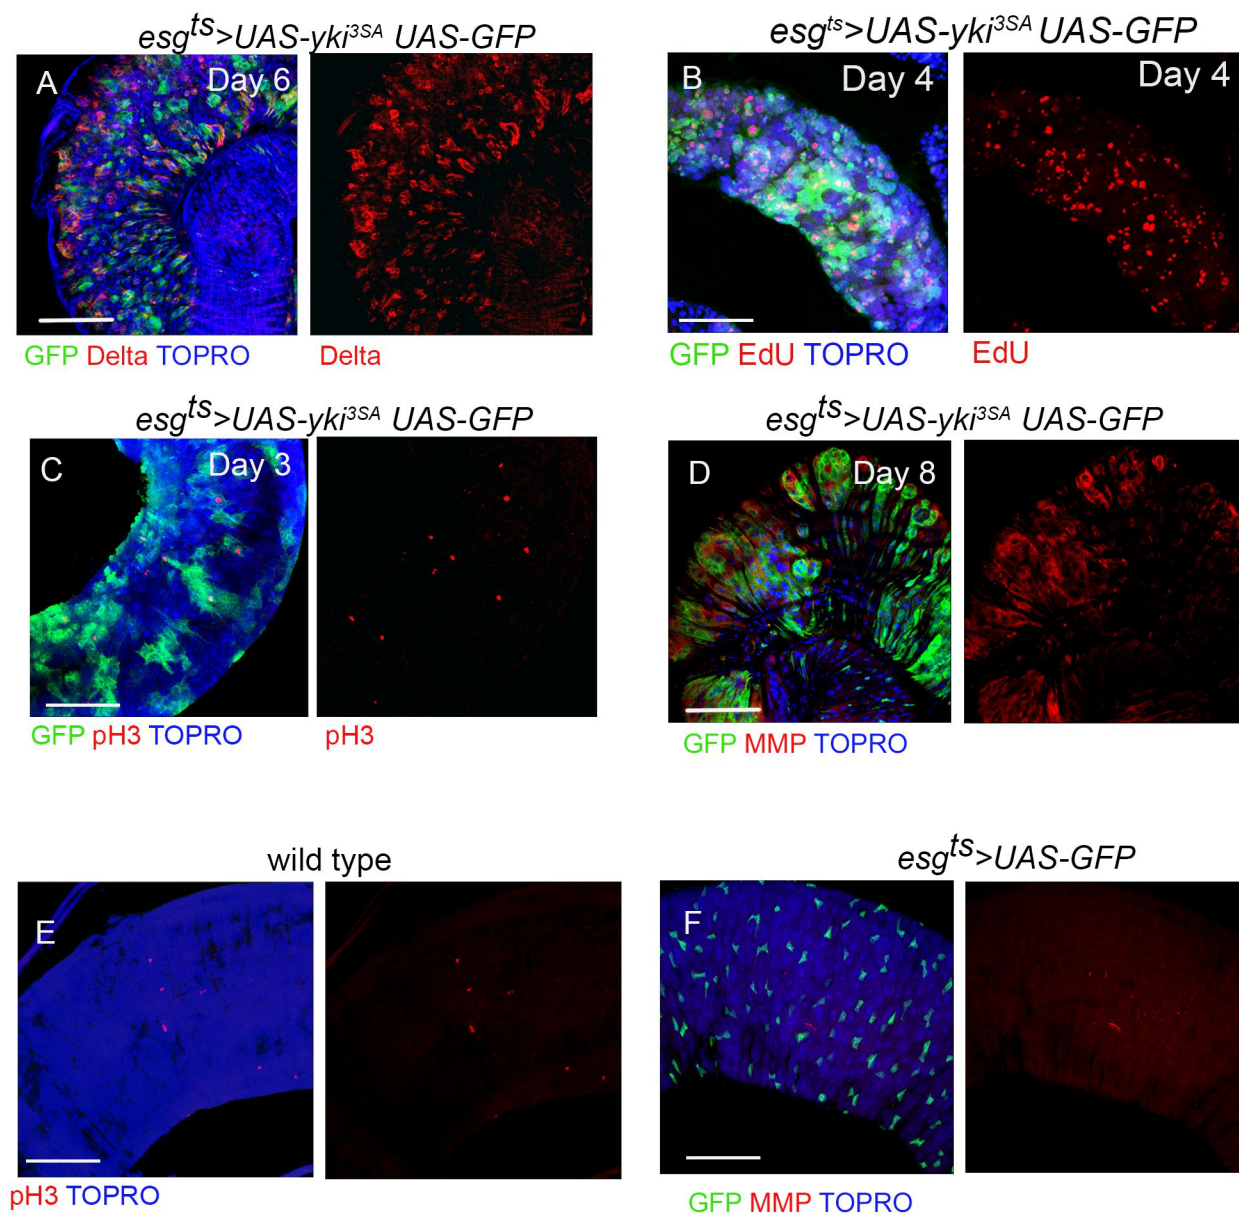

**Figure S1. ISCs with constitutive gain of Yki display tumor phenotypes.** (A-D) *esg<sup>ts</sup>>yki<sup>3SA</sup> UAS-GFP* tumors stained for the stem cell marker Delta (A), EdU uptake (B), Phospho-Histone (C), and MMP (D). (E-F) Wild-type guts displaying Phospho-Histone (E), and MMP (F). Scale bars 100 μm.

FIGURE S2

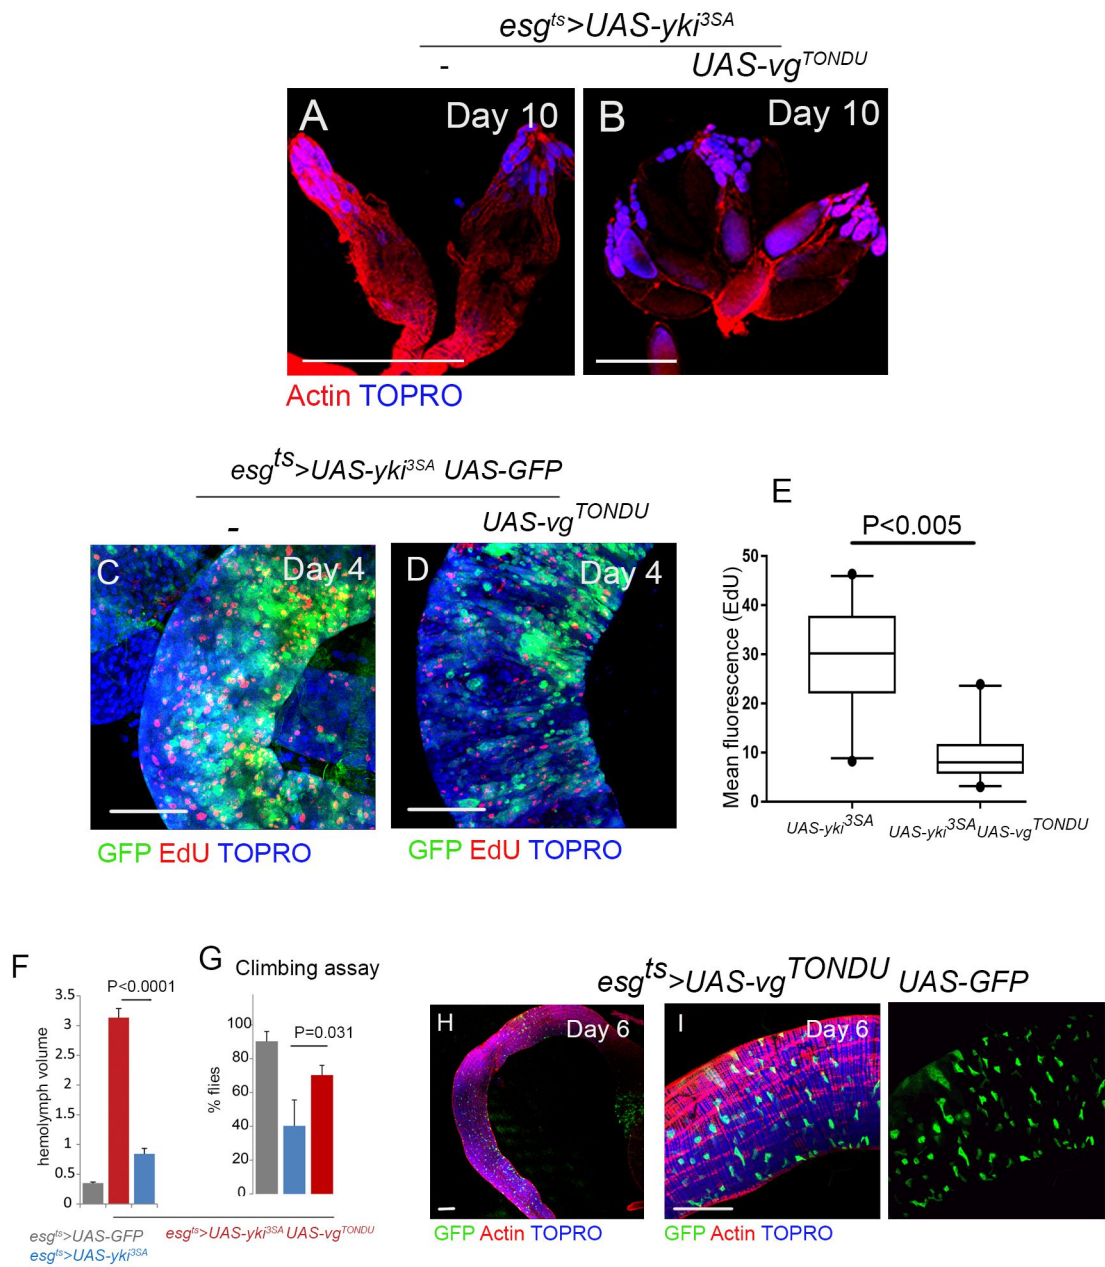

**Figure S2. Overexpression of the TONDU peptide inhibits Yki-driven epithelial tumors.** (A) Atrophy of ovaries in *esg<sup>ts</sup>>yki<sup>3SA</sup>* flies (n=21/25). (B) Improved morphology of ovaries in *esg<sup>ts</sup>>yki<sup>3SA</sup> UAS-vg<sup>TONDU</sup>* flies (n=12/25). (C-E) Decrease in the number of proliferating cells detected by EdU (red) staining in *esg<sup>ts</sup>>yki<sup>3SA</sup> UAS-vg<sup>TONDU</sup>* (D), compared to *esg<sup>ts</sup>>yki<sup>3SA</sup>* tumors (C). (E) Quantification of EdU fluorescence in C and D. Box plots indicate the median (horizontal lines), 25<sup>th</sup> and 75<sup>th</sup> percentiles (box) and 2.5 to 97.5 percentile range (whiskers). Outliers are displayed as filled circles. P values for Students t-test are displayed. (F) Decrease in hemolymph content (n=25) in *esg<sup>ts</sup>>yki<sup>3SA</sup> UAS-vg<sup>TONDU</sup>* flies compared to *esg<sup>ts</sup>>yki<sup>3SA</sup>* flies on Day 7. (G) TONDU-expressing *esg<sup>ts</sup>>yki<sup>3SA</sup>* flies (n=35) suppress the loss of climbing activity seen in *esg<sup>ts</sup>>yki<sup>3SA</sup>* flies. (H-I) Expression of TONDU peptide in ISCs (*esg<sup>ts</sup>>UAS-vg<sup>TONDU</sup>*) does not affect ISC numbers. Scale bars 100  $\mu$ m.

Figure S3

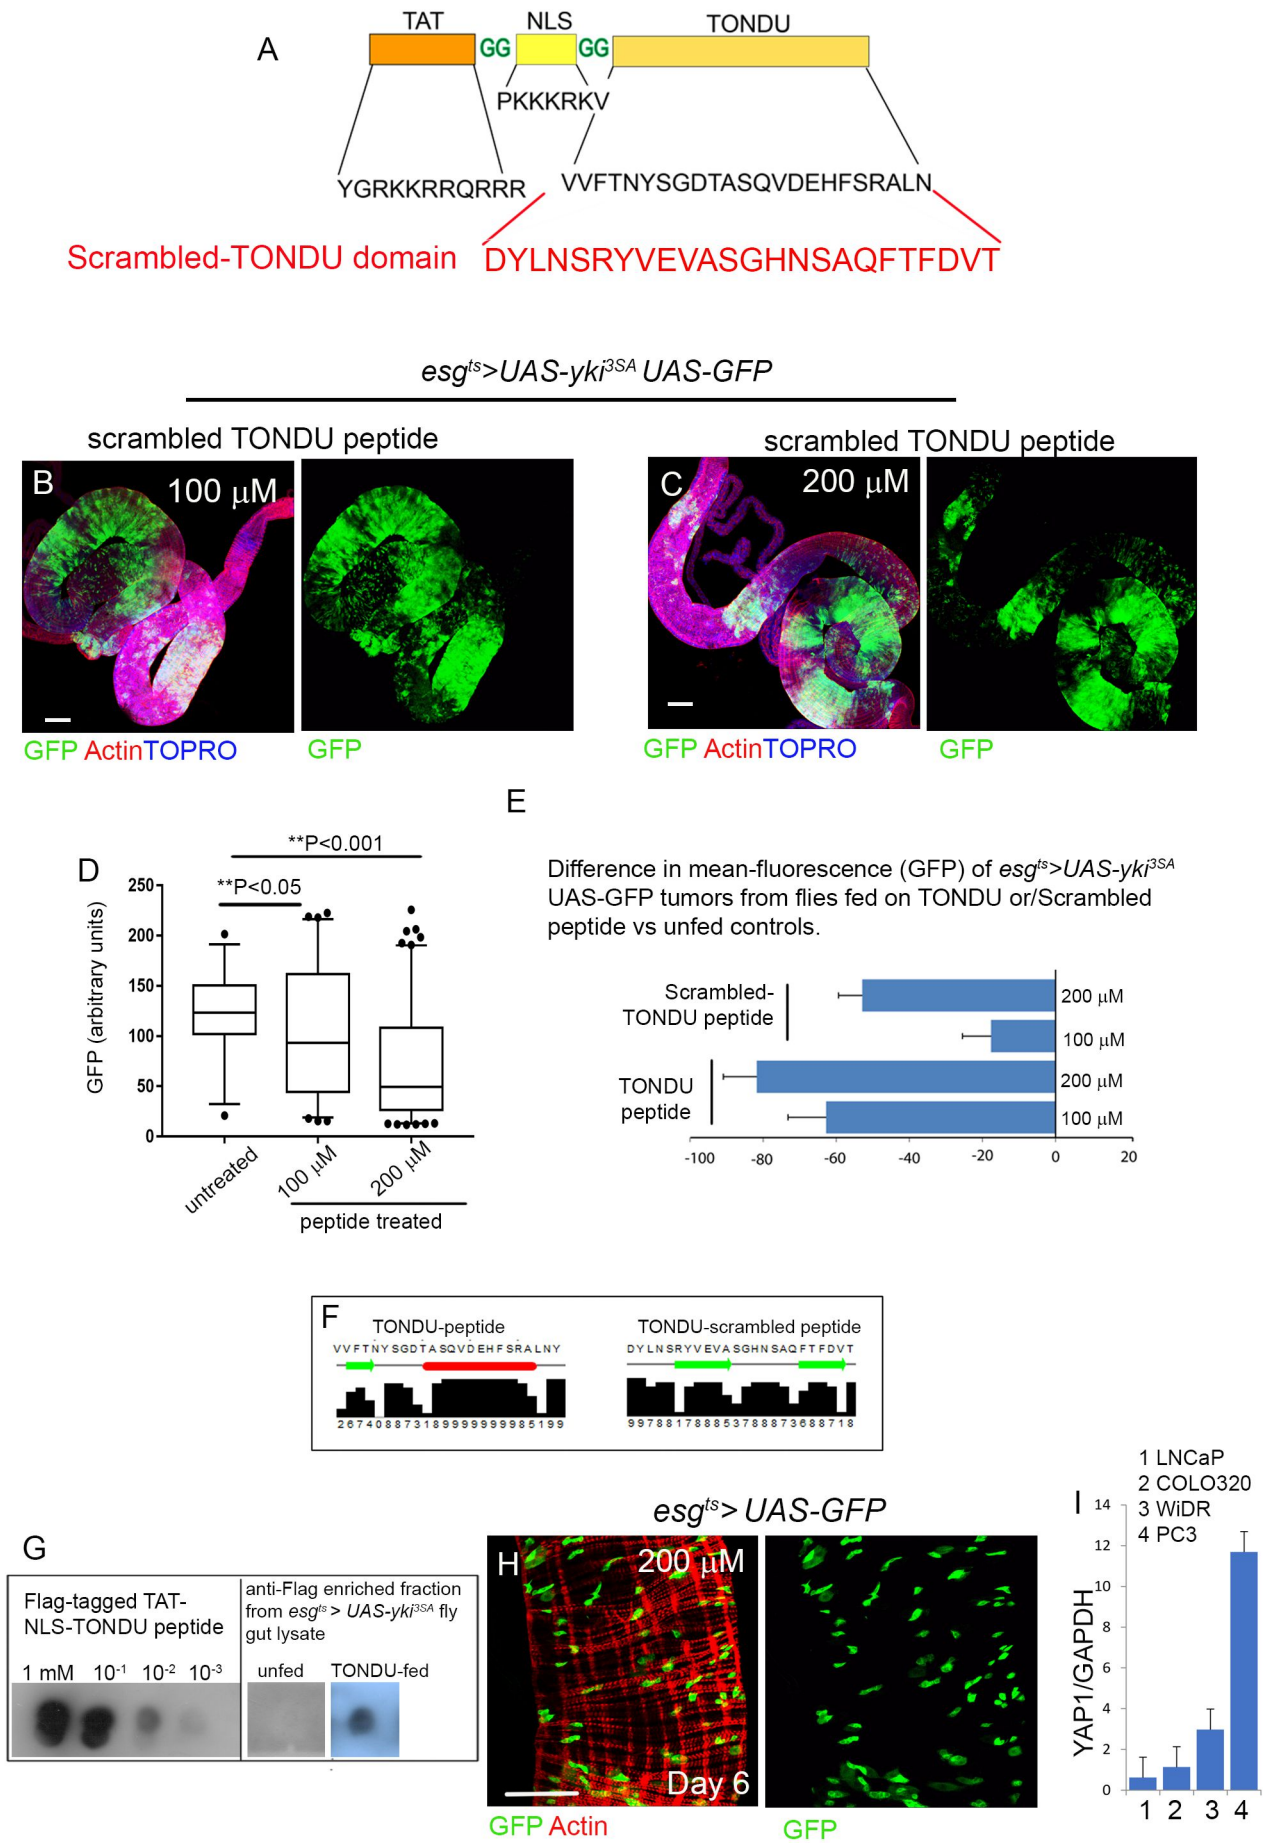

**Figure S3. Scrambled-TONDU peptide fails to suppress Yki-driven ISC tumors. (A)**

Schematic representation of the scrambled-TONDU peptide. (B-D) The scrambled-TONDU peptide displays poor growth inhibition of *esg<sup>ts</sup>>yki<sup>3SA</sup>* tumors (compare with Figure 2H and I). Box plot depicting GFP quantification in *esg<sup>ts</sup>>yki<sup>3SA</sup>* tumors from flies fed on scrambled TONDU peptide (D). Box plots indicate the median (horizontal lines), 25th and 75th percentiles (box) and 2.5 to 97.5 percentile range (whiskers). Outliers are displayed as filled circles. P values for Students t-test are displayed. (E) Histogram displaying decrease in mean-GFP of *esg<sup>ts</sup>>yki<sup>3SA</sup> UAS-GFP* tumors from flies fed with TONDU peptide or with scrambled-TONDU peptide, when compared to unfed controls. Note that the decrease is significantly more in TONDU peptide as compared to scrambled peptide fed tumors. (F) Secondary structures of the TONDU (left) and Scrambled-TONDU (right) as predicted by JPred (<http://www.compbio.dundee.ac.uk/jpred/>). Black bars represent the confidence estimate for the prediction (high value represents high confidence); helices are marked in red while green arrows depict sheets. (G) Dot blot for FLAG-tagged TONDU peptide using anti-FLAG antibody, on native peptide (different serial dilutions); and in cell lysate (right panel) from guts (n=25) of flies fed on 200  $\mu$ M of FLAG-tagged TONDU peptide and unfed flies used as control. (H) Control (*esg<sup>ts</sup>>UAS-GFP*) flies fed on 200  $\mu$ M of TONDU peptide do not display changes in ISC numbers. (I) mRNA levels of *YAPI* in different human cancer cell lines as determined by qPCR. Scale bars 100  $\mu$ m.

### Figure S4

X-Y plot depicting correlation between proteome and transcriptome of  $esg^{ts}>yki^{3SA}$  tumor

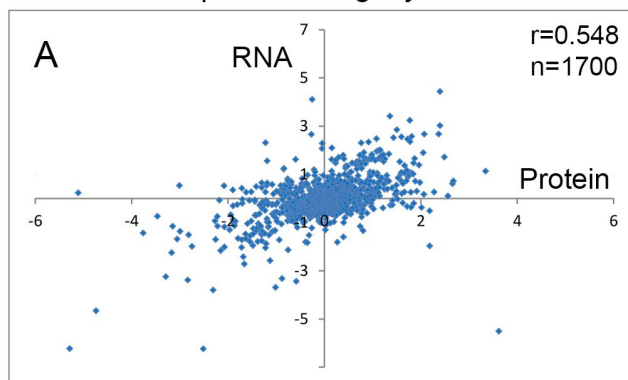

Scatter plot displaying fold change in individual proteins in  $esg^{ts}>yki^{3SA}$  tumors in presence of TONDU peptide

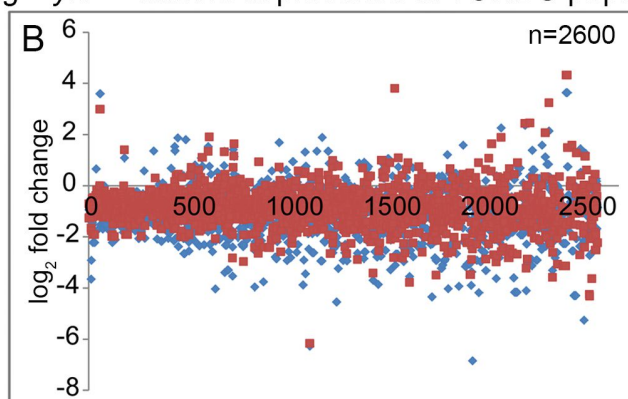

x axis: individual proteins  
 y axis: fold change

■  $esg^{ts}>yki^{3SA}$  tumors from flies fed on TONDU peptide versus unfed controls.

■  $esg^{ts}>yki^{3SA}; UAS-vg^{TONDU}$  versus  $esg^{ts}>yki^{3SA}$  tumors

X-Y plot depicting correlation between TONDU peptide-treated and TONDU peptide-expressed  $esg^{ts}>yki^{3SA}$  tumor proteome

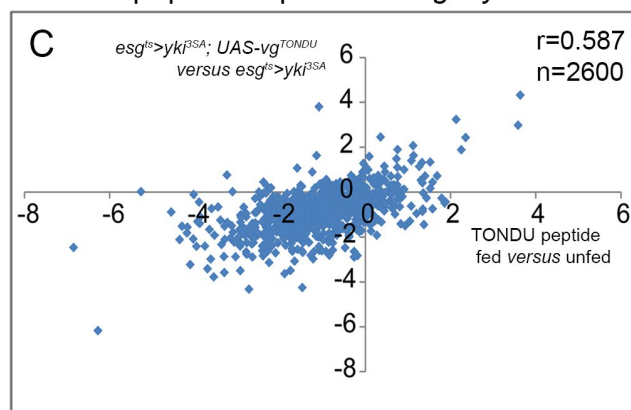

**Figure S4. Comparison of the proteomes of TONDU peptide-treated ISC tumors and tumors with genetic gain of peptide.** (A) X-Y correlation plot displaying Z-score comparison of  $\log_2$  fold change of genes in the proteome (current study) and transcriptome (Song et al., 2019) of  $esg^{ts}>yki^{3SA}$  tumors. (B) Scatter plots displaying fold change ( $\log_2$ ) for individual proteins (x axis) in TONDU peptide-fed versus unfed  $esg^{ts}>yki^{3SA}$  tumors (red); and for  $esg^{ts}>yki^{3SA} UAS-vg^{TONDU}$  versus  $esg^{ts}>yki^{3SA}$  tumors (blue). (C) X-Y correlation plot for B.

## Figure S5

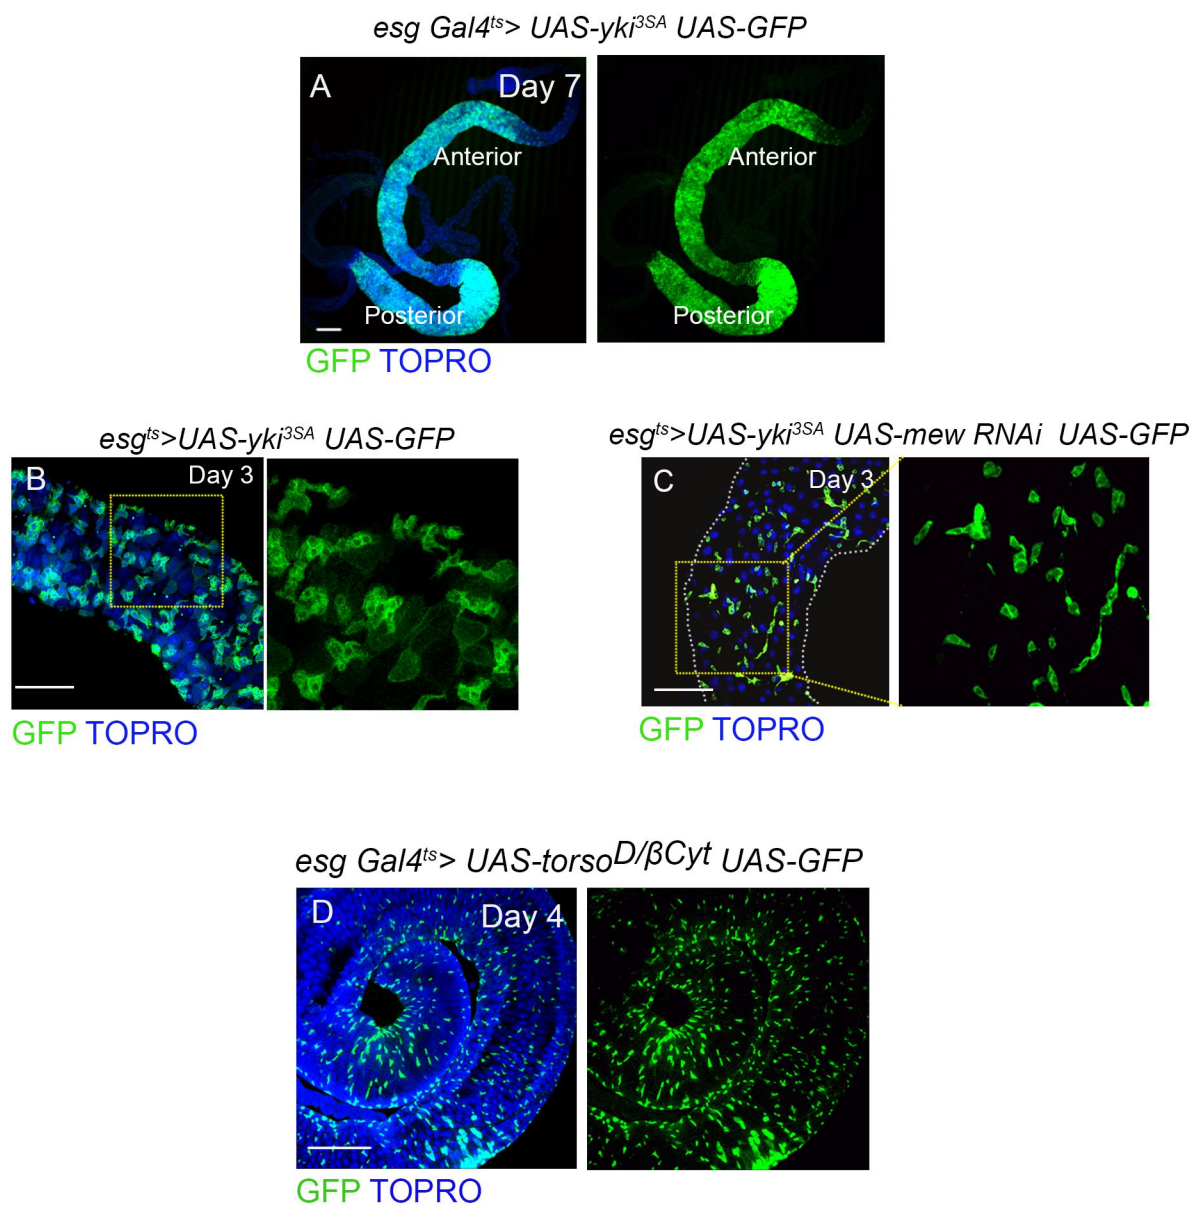

**Figure S5. Loss of integrin signaling in Yki-driven ISC tumors.** (A) *esg<sup>ts</sup> > yki<sup>3SA</sup>* tumors (day 7) control for *esg<sup>ts</sup> > yki<sup>3SA</sup> UAS-rhea RNAi* (see Fig. 4G). (B-C) Early *esg<sup>ts</sup> > yki<sup>3SA</sup> UAS-mew RNAi* tumors (day 3) display small ISC clusters (C) compared to similarly aged *esg<sup>ts</sup> > yki<sup>3SA</sup>* tumors (B). (D) Constitutive gain of integrin signaling in *esg<sup>ts</sup> > UAS-torso<sup>D/βCyt</sup>* as seen on day 4 of Gal4 activation. No aberrant increase in ISC numbers was observed. Scale bars 100  $\mu$ m.



**Table S1.** List of proteins identified by unlabeled LC-MS/MS proteomic analysis of Yki-driven Intestinal Stem Cell (ISC) tumors in *Drosophila* adult midguts.

[Click here to Download Table S1](#)

**Table S2.** Proteins with significant fold change ( $\geq \pm \log_2 2$ ,  $p < 0.05$ ) in day 7 versus day 1 of *esg<sup>ts</sup>>yki<sup>3SA</sup>* driven ISC tumors.

| Gene ID     | Gene Symbol                 | Protein FDR Confidence : Combined | Master                   | UniProt Accession | Median (Day 1) | Median (Day 7) | Abundance Ratio: Day 7/Day 1 | Abundance Ratio (log2) | T-Test (P value) | # amino acids | MW [kDa] | # Peptides (Sequest HT) | Chromosome | Found In Sample Group: (Day 1) | Found In Sample Group: (Day 7) |
|-------------|-----------------------------|-----------------------------------|--------------------------|-------------------|----------------|----------------|------------------------------|------------------------|------------------|---------------|----------|-------------------------|------------|--------------------------------|--------------------------------|
| FBgn0261276 | <i>Opa1</i>                 | High                              | None                     | F0JAH2            | 74046.703      | 297394.711     | 4.016                        | 2.006                  | 0.0048           | 453           | 51.2     | 2                       | 2R         | Peak Found                     | High                           |
| FBgn0000562 | <i>egl</i>                  | Medium                            | Master Protein Candidate | Q9W1K4            | 14056.321      | 57460.557      | 4.088                        | 2.031                  | 0.0430           | 1004          | 112.1    | 1                       | 2R         | Peak Found                     | High                           |
| FBgn0260442 | <i>rhea</i>                 | High                              | Master Protein           | Q960C2            | 67243.947      | 276212.477     | 4.108                        | 2.038                  | 0.0264           | 1601          | 171.2    | 26                      | 3L         | High                           | High                           |
| FBgn0035498 | <i>Fit1</i>                 | High                              | Master Protein           | Q9VZ13            | 394737.461     | 1640060.666    | 4.155                        | 2.055                  | 0.0276           | 708           | 80.4     | 6                       | 3L         | High                           | High                           |
| FBgn0035793 | <i>CG7546</i>               | High                              | Master Protein Candidate | M9PBU3            | 91147.313      | 390343.234     | 4.283                        | 2.098                  | 0.0087           | 1179          | 125.7    | 2                       | 3L         | High                           | High                           |
| FBgn0030955 | <i>CG6891</i>               | High                              | Master Protein Candidate | Q8MQZ6            | 100332.746     | 448638.875     | 4.472                        | 2.161                  | 0.0323           | 269           | 30.2     | 1                       | X          | High                           | High                           |
| FBgn0013437 | <i>copia</i>                | High                              | Master Protein           | P04146            | 581703.875     | 2664281.188    | 4.580                        | 2.195                  | 0.0138           | 1409          | 162.7    | 3                       |            | High                           | High                           |
| FBgn0265991 | <i>Zasp52</i>               | High                              | None                     | G3JX29            | 147506.977     | 678663.543     | 4.601                        | 2.202                  | 0.0366           | 651           | 70.9     | 3                       | 2R         | High                           | High                           |
| FBgn0015379 | <i>dod</i>                  | High                              | Master Protein           | P54353            | 10240.124      | 94620.563      | 9.240                        | 3.208                  | 0.0451           | 166           | 18.4     | 1                       | X          | Peak Found                     | High                           |
| FBgn0000667 | <i>Actn</i>                 | High                              | Master Protein Candidate | M9MS06            | 60172.696      | 284884.955     | 4.734                        | 2.243                  | 0.0489           | 895           | 103.8    | 4                       | X          | Peak Found                     | High                           |
| FBgn0010434 | <i>cora</i>                 | High                              | Master Protein Candidate | A0A0B4LFX4        | 469318.387     | 2248560.410    | 4.791                        | 2.260                  | 0.0047           | 1600          | 173.8    | 6                       | 2R         | High                           | High                           |
| FBgn0014020 | <i>Rho1</i>                 | High                              | Master Protein           | P48148            | 491985.963     | 2396139.059    | 4.870                        | 2.284                  | 0.0177           | 192           | 21.7     | 6                       | 2R         | Peak Found                     | High                           |
| FBgn0030052 | <i>CG12065</i>              | High                              | None                     | Q8MRM6            | 279747.601     | 1375997.625    | 4.919                        | 2.298                  | 0.0460           | 641           | 71.1     | 5                       | X          | Peak Found                     | High                           |
| FBgn0053470 | <i>CG33470; IM10; IMPPP</i> | High                              | Master Protein           | Q8ML70            | 3874.029       | 38433.805      | 9.921                        | 3.310                  | 0.0377           | 257           | 28       | 1                       | 2R         | Peak Found                     | High                           |
| FBgn0035499 | <i>Chd64</i>                | High                              | None                     | M9PE30            | 6518473.696    | 32604473.558   | 5.002                        | 2.322                  | 0.0003           | 175           | 19.4     | 25                      | 3L         | High                           | High                           |
| FBgn0025352 | <i>Mtpβ</i>                 | High                              | Master Protein           | O77466            | 60337.865      | 605581.250     | 10.037                       | 3.327                  | 0.0340           | 469           | 50.6     | 1                       | 2R         | Peak Found                     | High                           |
| FBgn0086346 | <i>ALiX</i>                 | High                              | Master Protein           | Q9VB05            | 77987.759      | 397127.230     | 5.092                        | 2.348                  | 0.0169           | 836           | 92.5     | 2                       | 3R         | Peak Found                     | High                           |
| FBgn0260442 | <i>rhea</i>                 | High                              | None                     | M9NDM3            | 1072195.987    | 5647432.310    | 5.267                        | 2.397                  | 0.0350           | 2169          | 235.1    | 31                      | 3L         | High                           | High                           |
| FBgn0004397 | <i>Vinc</i>                 | High                              | Master Protein           | X2JAB9            | 741152.635     | 3905646.674    | 5.270                        | 2.398                  | 0.0224           | 961           | 106.2    | 2                       | X          | High                           | High                           |
| FBgn0021760 | <i>chb</i>                  | High                              | Master Protein           | Q9NBD7            | 31028.359      | 169383.656     | 5.459                        | 2.449                  | 0.0329           | 1491          | 165.5    | 2                       | 3L         | Peak Found                     | High                           |
| FBgn0262567 | <i>CG43107</i>              | High                              | Master Protein           | D0IQC0            | 9607.135       | 107383.602     | 11.177                       | 3.483                  | 0.0174           | 63            | 6.8      | 1                       | 2R         | Peak Found                     | Peak Found                     |
| FBgn0013733 | <i>shot</i>                 | High                              | Master Protein           | A1Z9J3            | 28039.734      | 350253.043     | 12.491                       | 3.643                  | 0.0138           | 8805          | 988.9    | 2                       | 2R         | Peak Found                     | High                           |
| FBgn0033446 | <i>CG1648</i>               | High                              | Master Protein           | Q7K2P3            | 775279.577     | 5030252.721    | 6.488                        | 2.698                  | 0.0201           | 230           | 23.8     | 18                      | 2R         | High                           | High                           |
| FBgn0262735 | <i>Imp</i>                  | High                              | Master Protein           | Q0KHU2            | 88808.606      | 580638.375     | 6.538                        | 2.709                  | 0.0201           | 631           | 69.4     | 3                       | X          | Peak Found                     | High                           |
| FBgn0022709 | <i>Adk1</i>                 | High                              | Master Protein Candidate | Q9VTV3            | 17311.554      | 113919.848     | 6.581                        | 2.718                  | 0.0072           | 201           | 21.9     | 1                       | 3L         | Peak Found                     | High                           |
| FBgn0086906 | <i>sis</i>                  | High                              | None                     | R4UAY6            | 23315.416      | 308855.279     | 13.247                       | 3.728                  | 0.0122           | 662           | 74.6     | 2                       | 3L         | High                           | High                           |
| FBgn0010909 | <i>msn</i>                  | Medium                            | None                     | Q7KV90            | 7461.706       | 102635.387     | 13.755                       | 3.782                  | 0.0121           | 1200          | 130.3    | 1                       | 3L         | Peak Found                     | High                           |

|             |                   |        |                          |            |             |              |        |        |        |      |       |    |    |            |            |
|-------------|-------------------|--------|--------------------------|------------|-------------|--------------|--------|--------|--------|------|-------|----|----|------------|------------|
| FBgn0036580 | PDCD-5            | High   | Master Protein           | Q9VUZ8     | 11643.499   | 169815.949   | 14.585 | 3.866  | 0.0111 | 133  | 15.1  | 2  | 3L | Peak Found | Peak Found |
| FBgn0051901 | Mur29B            | Medium | Master Protein Candidate | Q8MS63     | 22220.121   | 166646.781   | 7.500  | 2.907  | 0.0366 | 339  | 35.7  | 1  | 2L | High       | High       |
| FBgn0265434 | zip               | High   | None                     | A0A0B4JD95 | 3745790.734 | 28852286.631 | 7.703  | 2.945  | 0.0010 | 1964 | 226.6 | 67 | 2R | High       | High       |
| FBgn0005666 | bent              | High   | None                     | O76281     | 284599.331  | 2219016.392  | 7.797  | 2.963  | 0.0385 | 6658 | 743   | 15 | 4  | Peak Found | High       |
| FBgn0262716 | Arp3; Arp66B      | High   | Master Protein           | P32392     | 91762.304   | 725246.529   | 7.904  | 2.982  | 0.0397 | 418  | 47    | 4  | 3L | High       | High       |
| FBgn0053113 | Rtnl1             | High   | Master Protein Candidate | Q9VMV9     | 594076.854  | 5048772.010  | 8.499  | 3.087  | 0.0238 | 595  | 63.9  | 9  | 2L | High       | High       |
| FBgn0085282 | CG34253           | High   | Master Protein           | A8JNV2     | 26812.808   | 228363.336   | 8.517  | 3.090  | 0.0221 | 112  | 12.5  | 1  | 3L | Peak Found | High       |
| FBgn0265434 | zip               | High   | None                     | J7JVR0     | 1687952.657 | 14541350.003 | 8.615  | 3.107  | 0.0003 | 1425 | 164.4 | 39 | 2R | High       | High       |
| FBgn0016726 | Rpl29             | High   | Master Protein           | B7FNL1     | 732637.288  | 6371885.220  | 8.697  | 3.121  | 0.0452 | 85   | 10    | 6  | 2R | High       | High       |
| FBgn0029766 | CG15784           | High   | Master Protein           | Q9W4C1     | 151556.702  | 1363172.164  | 8.994  | 3.169  | 0.0261 | 554  | 62.3  | 5  | X  | High       | High       |
| FBgn0038774 | CG5023            | High   | Master Protein           | Q9I7J0     | 580277.645  | 5744084.078  | 9.899  | 3.307  | 0.0314 | 169  | 19.1  | 9  | 3R | High       | High       |
| FBgn0001217 | Hsc70-2           | High   | Master Protein           | P11146     | 34573.184   | 694860.797   | 20.098 | 4.329  | 0.0135 | 633  | 69.7  | 3  | 3R | Peak Found | High       |
| FBgn0051363 | CG31363           | High   | Master Protein           | B5RJ67     | 30460.900   | 612434.938   | 20.106 | 4.330  | 0.0112 | 230  | 24.4  | 1  | 3R | Peak Found | High       |
| FBgn0000043 | Act42A            | High   | Master Protein           | P02572     | 13317.133   | 326000.129   | 24.480 | 4.614  | 0.0155 | 376  | 41.8  | 37 | 2R | Peak Found | High       |
| FBgn0004227 | nonA              | High   | Master Protein           | Q8IR16     | 51621.380   | 664389.951   | 12.870 | 3.686  | 0.0092 | 742  | 81.9  | 5  | X  | High       | High       |
| FBgn0011225 | jar               | High   | Master Protein           | Q01989     | 32407.746   | 421589.398   | 13.009 | 3.701  | 0.0170 | 1253 | 143.2 | 6  | 3R | Peak Found | High       |
| FBgn0034709 | CG3074; Swim      | High   | Master Protein           | Q7JWQ7     | 582800.990  | 7699009.721  | 13.210 | 3.724  | 0.0014 | 431  | 48.8  | 11 | 2R | High       | High       |
| FBgn0031436 | CG3214; ND-B17.2  | High   | Master Protein           | Q9VQD7     | 13005.392   | 404752.090   | 31.122 | 4.960  | 0.0032 | 142  | 16.8  | 2  | 2L | High       | High       |
|             |                   |        |                          |            |             |              |        |        |        |      |       |    |    |            |            |
|             |                   |        |                          |            |             |              |        |        |        |      |       |    |    |            |            |
| FBgn0000639 | Fbp1              | High   | Master Protein Candidate | M9PFK6     | 2941545.182 | 75592.226    | 0.026  | -5.282 | 0.0184 | 1027 | 119.4 | 15 | 3L | High       | Peak Found |
| FBgn0033297 | Mal-A8            | High   | Master Protein Candidate | H5V882     | 145483.008  | 4449.611     | 0.031  | -5.031 | 0.0020 | 597  | 68.1  | 1  | 2R | High       | Peak Found |
| FBgn0010497 | dmGlut; I(2)01810 | Medium | Master Protein Candidate | Q95R95     | 217644.070  | 7972.730     | 0.037  | -4.771 | 0.0143 | 165  | 17.7  | 1  | 2L | High       | Peak Found |
| FBgn0004426 | LysC              | High   | None                     | P83971     | 1020142.977 | 101441.592   | 0.099  | -3.330 | 0.0171 | 140  | 15.6  | 2  | 3L | High       | Peak Found |
| FBgn0031141 | CG1304            | High   | None                     | Q9VRD1     | 1379758.828 | 251684.488   | 0.182  | -2.455 | 0.0240 | 260  | 27.8  | 1  | X  | High       | High       |
| FBgn0004427 | LysD              | High   | Master Protein Candidate | P83972     | 2366383.414 | 523926.295   | 0.221  | -2.175 | 0.0126 | 140  | 15.6  | 3  | 3L | High       | High       |
| FBgn0004425 | LysB              | High   | Master Protein Candidate | Q08694     | 2366383.414 | 523926.295   | 0.221  | -2.175 | 0.0126 | 140  | 15.6  | 3  | 3L | High       | High       |
| FBgn0004428 | LysE              | High   | Master Protein           | P37159     | 2366383.414 | 523926.295   | 0.221  | -2.175 | 0.0126 | 140  | 15.5  | 3  | 3L | High       | High       |
| FBgn0034662 | CG13492           | High   | Master Protein           | Q8MLU9     | 1715613.215 | 393704.303   | 0.229  | -2.124 | 0.0428 | 2979 | 321.1 | 12 | 2R | High       | High       |
| FBgn0040349 | CG3699            | High   | Master Protein Candidate | Q9U1L2     | 6207241.123 | 1490634.446  | 0.240  | -2.058 | 0.0024 | 251  | 26    | 12 | X  | High       | High       |

**Table S3.** Interacting partners belonging to the Hippo pathway for proteins with  $\geq \log_2 2$  fold change in *esg<sup>ts</sup>>yki<sup>3SA</sup>* driven ISC tumors.

| Protein      | Fold change (log <sub>2</sub> fold) | T Test P value |            | Uniprot    | §Hippo protein-protein interaction network |       |
|--------------|-------------------------------------|----------------|------------|------------|--------------------------------------------|-------|
|              |                                     |                |            |            | Protein-and-Hippo pathway member           | Score |
| Cora         | 2.2604                              | 0.0047         | High       | A0A0B4LFX4 | Cora $\leftrightarrow$ Ft                  | 1*    |
| Mtb- $\beta$ | 3.3272                              | 0.0340         | Peak Found | O77466     | Mtb- $\beta$ $\leftrightarrow$ Ft          | 0.99* |
| Msn          | 3.7819                              | 0.0121         | Peak Found | Q7KV90     | Msn $\leftrightarrow$ Ft                   | 1*    |
| nonA         | 3.6860                              | 0.0092         | High       | Q81R16     | nonA $\leftrightarrow$ Ex                  | 0.82* |
| Jar          | 3.7014                              | 0.0170         | Peak Found | Q01989     | Jar $\leftrightarrow$ Wts                  | 0.89* |
| Talin        | 2.0383                              | 0.0264         | High       | Q960C2     | Talin $\leftrightarrow$ Yki                | 0.33  |
| Vinc         | 2.2184                              | 0.0188         | High       | Q24584     | Vinc $\leftrightarrow$ Ft                  | 0.36  |
| Chd64        | 2.3225                              | 0.0003         | High       | M9PE30     | Chd64 $\leftrightarrow$ Yki                | 0.01  |
| Mtb- $\beta$ | 3.3272                              | 0.0340         | Peak Found | O77466     | Mtb- $\beta$ $\leftrightarrow$ Wts         | 0.1   |
| Arp3         | 2.9825                              | 0.0397         | High       | P32392     | Arp3 $\leftrightarrow$ Wts                 | 0.21  |
| Rtnl1        | 3.0872                              | 0.0238         | High       | Q9VMV9     | Rtnl1 $\leftrightarrow$ Ft                 | 0.38  |
| nonA         | 3.6860                              | 0.0092         | High       | Q81R16     | nonA $\leftrightarrow$ Wts                 | 0.28  |

§Kwon *et al.* (Kwon *et al.*, 2013). \*Statistically significant interactions

**Table S4.** Gene Ontology (GO) analysis of enriched proteins in *esg<sup>ts</sup>>yki<sup>3SA</sup>* driven ISC tumors.

| MOLECULAR FUNCTION        |   | §GO classes                                                 | Gene Numbers | % representation | % representation |
|---------------------------|---|-------------------------------------------------------------|--------------|------------------|------------------|
|                           | 1 | binding (GO:0005488)                                        | 7            | 19.40%           | 29.20%           |
|                           | 2 | structural molecule activity (GO:0005198)                   | 6            | 16.70%           | 25.00%           |
|                           | 3 | molecular function regulator (GO:0098772)                   | 1            | 2.80%            | 4.20%            |
|                           | 4 | catalytic activity (GO:0003824)                             | 10           | 27.80%           | 41.70%           |
| <b>BIOLOGICAL PROCESS</b> |   |                                                             |              |                  |                  |
|                           | 1 | response to stimulus (GO:0050896)                           | 2            | 5.60%            | 7.40%            |
|                           | 2 | cellular process (GO:0009987)                               | 11           | 30.60%           | 40.70%           |
|                           | 3 | multicellular organismal process (GO:0032501)               | 1            | 2.80%            | 3.70%            |
|                           | 4 | metabolic process (GO:0008152)                              | 6            | 16.70%           | 22.20%           |
|                           | 5 | biological regulation (GO:0065007)                          | 2            | 5.60%            | 7.40%            |
|                           | 6 | localization (GO:0051179)                                   | 4            | 11.10%           | 14.80%           |
|                           | 7 | biological adhesion (GO:0022610)                            | 1            | 2.80%            | 3.70%            |
| <b>CELLULAR COMPONENT</b> |   |                                                             |              |                  |                  |
|                           | 1 | organelle (GO:0043226)                                      | 9            | 25.00%           | 45.00%           |
|                           | 2 | extracellular region (GO:0005576)                           | 1            | 2.80%            | 5.00%            |
|                           | 3 | cell (GO:0005623)                                           | 10           | 27.80%           | 50.00%           |
| <b>PROTEIN CLASSES</b>    |   |                                                             |              |                  |                  |
|                           | 1 | transmembrane receptor regulatory/adaptor protein (PC00226) | 1            | 2.80%            | 4.20%            |
|                           | 2 | hydrolase (PC00121)                                         | 5            | 13.90%           | 20.80%           |
|                           | 3 | cell junction protein (PC00070)                             | 1            | 2.80%            | 4.20%            |

|                 |    |                                                                            |   |        |        |
|-----------------|----|----------------------------------------------------------------------------|---|--------|--------|
|                 | 4  | enzyme modulator (PC00095)                                                 | 6 | 16.70% | 25.00% |
|                 | 5  | nucleic acid binding (PC00171)                                             | 3 | 8.30%  | 12.50% |
|                 | 6  | transferase (PC00220)                                                      | 1 | 2.80%  | 4.20%  |
|                 | 7  | receptor (PC00197)                                                         | 1 | 2.80%  | 4.20%  |
|                 | 8  | cytoskeletal protein (PC00085)                                             | 5 | 13.90% | 20.80% |
|                 | 9  | structural protein (PC00211)                                               | 1 | 2.80%  | 4.20%  |
| <b>PATHWAYS</b> |    |                                                                            |   |        |        |
|                 | 1  | Gonadotropin-releasing hormone receptor pathway (P06664)                   | 1 | 2.80%  | 4.30%  |
|                 | 2  | Cadherin signaling pathway (P00012)                                        | 1 | 2.80%  | 4.30%  |
|                 | 3  | De novo purine biosynthesis (P02738)                                       | 1 | 2.80%  | 4.30%  |
|                 | 4  | Axon guidance mediated by Slit/Robo (P00008)                               | 1 | 2.80%  | 4.30%  |
|                 | 5  | Apoptosis signaling pathway (P00006)                                       | 1 | 2.80%  | 4.30%  |
|                 | 6  | Integrin signalling pathway (P00034)                                       | 5 | 13.90% | 21.70% |
|                 | 7  | Angiogenesis (P00005)                                                      | 1 | 2.80%  | 4.30%  |
|                 | 8  | Alzheimer disease-presenilin pathway (P00004)                              | 1 | 2.80%  | 4.30%  |
|                 | 9  | Inflammation mediated by chemokine and cytokine signaling pathway (P00031) | 2 | 5.60%  | 8.70%  |
|                 | 10 | Huntington disease (P00029)                                                | 1 | 2.80%  | 4.30%  |
|                 | 11 | Parkinson disease (P00049)                                                 | 1 | 2.80%  | 4.30%  |
|                 | 12 | Ras Pathway (P04393)                                                       | 1 | 2.80%  | 4.30%  |
|                 | 13 | Cytoskeletal regulation by Rho GTPase (P00016)                             | 3 | 8.30%  | 13.00% |
|                 | 14 | Nicotinic acetylcholine receptor signaling pathway (P00044)                | 3 | 8.30%  | 13.00% |

<sup>§</sup>GO enrichment was determined using PANTHER (<http://www.pantherdb.org/>).

**Table S5.** Status of integrin pathway members in *esg<sup>ts</sup>>yki<sup>3SA</sup>* driven ISC tumors.

| Gene ID               | Pathway member              | Fly base ID | Proteomics<br>(log <sub>2</sub> fold). Current study | <sup>§</sup> RNAseq<br>(log <sub>2</sub> fold) |
|-----------------------|-----------------------------|-------------|------------------------------------------------------|------------------------------------------------|
| <i>scb/αPS3</i>       | Integrin receptor           | FBgn0003328 | 2.6069 (UP, P=0.270)                                 | 3.2797 (UP)                                    |
| <i>rhea</i>           | Adaptor                     | FBgn0260442 | 2.3970 (UP, P=0.035)                                 | 2.4646 (UP)                                    |
| <i>Ilk</i>            | Kinase and Scaffold protein | FBgn0028427 | 2.0724 (UP, P=0.056)                                 | 1.6871 (UP)                                    |
| <i>Pax</i>            | Scaffold protein            | FBgn0041789 | 6.0551 (UP, P=0.051)                                 | 1.6507 (UP)                                    |
| <i>Vinc</i>           | Scaffold protein            | FBgn0004397 | 2.3977 (UP, P=0.022)                                 | 2.8706 (UP)                                    |
| <i>vkg</i>            | Basemen Membrane            | FBgn0016075 | 1.8255 (UP, P=0.014)                                 | 2.5527 (UP)                                    |
| <i>Rho1</i>           | GTPase                      | FBgn0014020 | 2.2840 (UP, P=0.018)                                 | 2.3794 (UP)                                    |
| <i>Act42A</i>         | Cytoskeleton                | FBgn0000043 | 4.6013 (UP, P=0.1934)                                | 5.1188 (UP)                                    |
| <i>mew/αPS1</i>       | Integrin receptor           | FBgn0004456 | not found                                            | 3.3184 (UP)                                    |
| <i>mys/βPS1</i>       | Integrin receptor           | FBgn0004657 | not found                                            | 3.7469 (UP)                                    |
| <i>if/αPS2</i>        | Integrin receptor           | FBgn0001250 | not found                                            | 0.3507                                         |
| <i>Itgβn/Itgβtanu</i> | Integrin receptor           | FBgn0010395 | not found                                            | 0.1434                                         |
| <i>LanA</i>           | Ligand                      | FBgn0002526 | not found                                            | 3.0021 (UP)                                    |
| <i>wb/LanA1</i>       | Ligand                      | FBgn0261563 | not found                                            | 2.0211 (UP)                                    |
| <i>LanB1</i>          | Ligand                      | FBgn0261800 | not found                                            | 2.4286 (UP)                                    |

<sup>§</sup> Song *et al.* (Song *et al.*, 2019).

**Table S6.** Putative Yki-Sd binding sites<sup>§</sup> in regulatory regions of genes found enriched in *esg<sup>ts</sup>>yki<sup>3SA</sup>* tumors.

| Fly base ID | Gene Symbol       | Fold enrichment in <i>esg<sup>ts</sup>&gt;yki<sup>3SA</sup></i> tumors | Chromosome | <sup>§</sup> Yki-Sd binding site from TSS   |
|-------------|-------------------|------------------------------------------------------------------------|------------|---------------------------------------------|
| FBgn0261276 | <i>opa1</i>       | 2.0059                                                                 | 2R         | -690*                                       |
| FBgn0000562 | <i>egl</i>        | 2.0314                                                                 | 2R         | -9.5                                        |
| FBgn0035498 | <i>Fit1</i>       | 2.0548                                                                 | 3L         | -317                                        |
| FBgn0035793 | <i>CG7546</i>     | 2.0985                                                                 | 3L         | -533, 193                                   |
| FBgn0030955 | <i>CG6891</i>     | 2.1608                                                                 | X          | -682; -316; 456                             |
| FBgn0015379 | <i>dod</i>        | 3.2079                                                                 | X          | -29.5                                       |
| FBgn0000667 | <i>Actn</i>       | 2.2432                                                                 | X          | 233.5                                       |
| FBgn0010434 | <i>cora</i>       | 2.2604                                                                 | 2R         | 346.5                                       |
| FBgn0014020 | <i>Rho1</i>       | 2.2840                                                                 | 2R         | 22.5; 1058.5                                |
| FBgn0030052 | <i>CG12065</i>    | 2.2983                                                                 | X          | 87; 647.5                                   |
| FBgn0035499 | <i>Chd64</i>      | 2.3225                                                                 | 3L         | 57.5                                        |
| FBgn0025352 | <i>Mtpbeta</i>    | 3.3272                                                                 | 2R         | -129                                        |
| FBgn0021760 | <i>chb</i>        | 2.4486                                                                 | 3L         | -100; 92; 841                               |
| FBgn0013733 | <i>shot</i>       | 3.6429                                                                 | 2R         | 94; -421.5; -1118.5; 7211; 839; 503; -114.5 |
| FBgn0033446 | <i>CG1648</i>     | 2.6978                                                                 | 2R         | 1867                                        |
| FBgn0010909 | <i>msn</i>        | 3.7819                                                                 | 3L         | 446; -30.5                                  |
| FBgn0053113 | <i>Rtn1</i>       | 3.0872                                                                 | 2L         | -599.5; -308.5; -1035.5; 90.5               |
| FBgn0016726 | <i>Rpl-29B</i>    | 3.1205                                                                 | 2R         | -77                                         |
| FBgn0000043 | <i>Act42A</i>     | 4.6135                                                                 | 2R         | -52; -365                                   |
| FBgn0011225 | <i>jar</i>        | 3.7014                                                                 | 3R         | -562.5                                      |
| FBgn0028427 | <i>ilk</i>        | 2.0724                                                                 | 3L         | -4.5                                        |
| FBgn0041789 | <i>Pax</i>        | 6.0551                                                                 | 2L         | -19                                         |
| FBgn0004397 | <i>vinc</i>       | 2.3977                                                                 | X          | 64.5; -614                                  |
| FBgn0004456 | <i>mew</i>        | not found                                                              | X          | -185                                        |
| FBgn0004657 | <i>alphaPS2</i>   | not found                                                              | X          | 630.5; 1586; 1995.5                         |
| FBgn0010395 | <i>Itgbeta nu</i> | not found                                                              | 2L         | -110                                        |
| FBgn0002526 | <i>IanA</i>       | not found                                                              | 3L         | -569.5; -1244                               |

<sup>§</sup>Nagaraj *et al.* (Nagaraj *et al.*, 2012).

**Table S7.** Change in levels of proteins in TONDU peptide-treated *esg<sup>ts</sup>>yki<sup>3SA</sup>* driven ISC tumors.

| Fly base ID | Gene symbol    | FDR confidence | UniProt Accession | TREATED          |                  |
|-------------|----------------|----------------|-------------------|------------------|------------------|
|             |                |                |                   | Abundance Ratio. | T-Test (p value) |
| FBgn0261276 | <i>opa1</i>    | High           | F0JAH2            | -0.9677          | 0.0612           |
| FBgn0000562 | <i>egl</i>     | Medium         | Q9W1K4            | Not found        | Not found        |
| FBgn0260442 | <i>rhea</i>    | High           | Q960C2            | -0.9850          | 0.6182           |
| FBgn0035498 | <i>Fit1</i>    | High           | Q9VZ13            | -1.3108          | 0.4323           |
| FBgn0035793 | <i>CG7546</i>  | High           | M9PBU3            | -1.9655          | 0.0057           |
| FBgn0030955 | <i>CG6891</i>  | High           | Q8MQZ6            | -2.5940          | 0.0034           |
| FBgn0013437 | <i>GIP</i>     | High           | P04146            | -2.1634          | 0.0034           |
| FBgn0265991 | <i>Zasp52</i>  | High           | G3JX29            | -1.2146          | 0.1208           |
| FBgn0015379 | <i>dod</i>     | High           | P54353            | not found        | Not found        |
| FBgn0000667 | <i>Actn</i>    | High           | M9MS06            | -1.3641          | 0.0427           |
| FBgn0010434 | <i>cora</i>    | High           | A0A0B4LFX4        | -1.0595          | 0.0051           |
| FBgn0014020 | <i>Rho1</i>    | High           | P48148            | -0.8551          | 0.0536           |
| FBgn0030052 | <i>CG12065</i> | High           | Q8MRM6            | -1.5401          | 0.0876           |

|             |                             |        |            |           |           |
|-------------|-----------------------------|--------|------------|-----------|-----------|
| FBgn0053470 | <i>CG33470; IM10; IMPPP</i> | High   | Q8ML70     | -0.7563   | 0.4986    |
| FBgn0035499 | <i>Chd64</i>                | High   | M9PE30     | -1.2033   | 0.0076    |
| FBgn0025352 | <i>Mtpbeta</i>              | High   | O77466     | -2.3300   | 0.0139    |
| FBgn0086346 | <i>ALiX</i>                 | High   | Q9VB05     | -2.3246   | 0.0151    |
| FBgn0260442 | <i>rhea</i>                 | High   | M9NDM3     | -1.2592   | 0.0478    |
| FBgn0004397 | <i>Vinc</i>                 | High   | X2JAB9     | -1.3361   | 0.0365    |
| FBgn0021760 | <i>chb</i>                  | High   | Q9NBD7     | -2.1663   | 0.0263    |
| FBgn0262567 | <i>CG43107</i>              | High   | D0IQC0     | -1.6068   | 0.1094    |
| FBgn0013733 | <i>shot</i>                 | High   | A1Z9J3     | not found | Not found |
| FBgn0033446 | <i>CG1648</i>               | High   | Q7K2P3     | -1.2957   | 0.0316    |
| FBgn0262735 | <i>Imp</i>                  | High   | Q0KHU2     | -1.6114   | 0.0313    |
| FBgn0022709 | <i>Adk1</i>                 | High   | Q9VTV3     | -1.5700   | 0.0068    |
| FBgn0086906 | <i>sls</i>                  | High   | R4UAY6     | -1.2668   | 0.0439    |
| FBgn0010909 | <i>msn</i>                  | Medium | Q7KV90     | -0.9091   | 0.0273    |
| FBgn0036580 | <i>PDCD-5</i>               | High   | Q9VUZ8     | -1.1028   | 0.3096    |
| FBgn0051901 | <i>Mur29B</i>               | Medium | Q8MS63     | -1.0776   | 0.0244    |
| FBgn0265434 | <i>zip</i>                  | High   | A0A0B4JD95 | -1.1648   | 0.0140    |
| FBgn0005666 | <i>bt</i>                   | High   | O76281     | -2.5538   | 0.0038    |
| FBgn0262716 | <i>Arp3; Arp66B</i>         | High   | P32392     | -1.1503   | 0.0234    |
| FBgn0053113 | <i>Rtnl1</i>                | High   | Q9VMV9     | -1.2851   | 0.0129    |
| FBgn0085282 | <i>CG34253</i>              | High   | A8JNV2     | -0.4406   | 0.0846    |
| FBgn0265434 | <i>zip-RC</i>               | High   | J7JVR0     | -1.1466   | 0.0063    |
| FBgn0016726 | <i>Rpl-29B</i>              | High   | B7FNL1     | -1.8229   | 0.1047    |
| FBgn0029766 | <i>CG15784</i>              | High   | Q9W4C1     | -2.6531   | 0.0395    |
| FBgn0038774 | <i>CG5023</i>               | High   | Q9I7J0     | -1.3464   | 0.0059    |
| FBgn0001217 | <i>Hsc70-2</i>              | High   | P11146     | -1.5196   | 0.0343    |
| FBgn0051363 | <i>Jupiter-RD</i>           | High   | B5RJ67     | not found | not found |
| FBgn0000043 | <i>Act42A</i>               | High   | P02572     | -3.6540   | 0.0297    |
| FBgn0004227 | <i>nonA</i>                 | High   | Q8IR16     | -0.8528   | 0.0079    |
| FBgn0011225 | <i>jar</i>                  | High   | Q01989     | -0.3926   | 0.4731    |
| FBgn0034709 | <i>CG3074; Swim</i>         | High   | Q7JWQ7     | -1.6677   | 0.0054    |
| FBgn0031436 | <i>CG3214; ND-B17.2</i>     | High   | Q9VQD7     | -0.3077   | 0.4512    |

**Table S8.** Fly lines and their source.

|   | Fly Genotype                                | Source                                        |        |
|---|---------------------------------------------|-----------------------------------------------|--------|
| 1 | <i>UAS-yki</i> <sup>S111A.S168A.S250A</sup> | #BDSC                                         | #28817 |
| 2 | <i>UAS-mew RNAi</i>                         | #BDSC                                         | #27543 |
| 3 | <i>UAS-rhea RNAi</i>                        | #BDSC                                         | #28950 |
| 4 | <i>lgl<sup>4</sup>FRT 40A</i>               | #BDSC                                         | #36289 |
| 5 | <i>esg-Gal4</i>                             | Norbert Perrimon, Harvard Medical School, USA | -      |
| 6 | <i>UAS-torso<sup>D</sup>/βcyt</i>           | Nick Brown, University of Cambridge, UK       | -      |

#Bloomington Drosophila Stock Center, Indiana University, Bloomington.

**Table S9.** List of antibodies their source and working dilutions.

|   | Protein                                  | Catalog Number | Source                   | Raised in | Working dilution |
|---|------------------------------------------|----------------|--------------------------|-----------|------------------|
| 1 | Delta (extra cellular domain)            | C594.9B        | #DSHB                    | mouse     | 1:50             |
| 2 | Sd                                       | -              | Gift from (De Celis lab) | rabbit    | 1:100            |
| 3 | Talin (carboxy terminus 534 amino acids) | A22A           | #DSHB                    | mouse     | 1:100            |
| 4 | αPS1 , Mew                               | DK.1A4         | #DSHB                    | mouse     | 1:50             |

#Developmental Studies Hybridoma Bank, University of Iowa.

**Table S10.** List of PCR primers.

|    |                                | Forward primer          | Reverse primer              |
|----|--------------------------------|-------------------------|-----------------------------|
|    | <b>For expression analysis</b> |                         |                             |
| 1. | <i>ImpL2</i>                   | AAGAGCCGTGGACCTGGTA     | TTGGTGAACCTTGAGCCAGTCG      |
| 2. | <i>yki</i>                     | CCTTGCCGCCGGGATGG       | TTTGCTGCTGCTGGCGATATTG      |
| 3  | <i>delta</i>                   | AGCGACTCTTGGTGCAGCAGGTA | TCCGTAGTAGTTGAGATCGCAGGTGAC |
| 4  | <i>myc</i>                     | ACACGCGCTGCAACGATATGG   | CGAGGGATTTGTGGGTAGCTTCTT    |
| 5  | <i>wg</i>                      | TGATGGCCCTGTGCAGCG      | TGATGGCCCTGTGCAGCG          |
| 6  | <i>ex</i>                      | GCCGCCTTTACCTGTCCAAC    | CGTTCGGTTTCCAATTAGCT        |
| 7  | <i>β-tub</i>                   | CAAGCTGGCAGTGC GGCAAC   | GCTGTCACCGTGGTAGGCGCC       |
| 8  | <i>YAPI</i>                    | ACGTTTCATCTGGGACAGCAT   | GTTGGGAGATGGCAAAGACA        |
| 9  | <i>GAPDH</i>                   | TGCACCACCAACTGCTTAGC    | GGCATGGACTGTGGTCATGAG       |
|    | <b>ChIP PCR</b>                |                         |                             |
| 10 | <i>Mew</i>                     | GCTTTGGTGGGGCTTGTAAC    | GTAAAGGCATGAGCGCCAAAT       |

**Table S11.** Genotype of the *Drosophila* lines used in this study

|   | <b>Description</b>                                                                                         | <b>Figures</b>                                      | <b>Genotype</b>                                                                                                                                                           |
|---|------------------------------------------------------------------------------------------------------------|-----------------------------------------------------|---------------------------------------------------------------------------------------------------------------------------------------------------------------------------|
| 1 | Control flies bearing GFP-marked ISCs.                                                                     | Pertaining to figures 1 and 4                       | <i>esg-Gal4, tub-Gal80<sup>ts</sup>, UAS-GFP; +</i>                                                                                                                       |
| 2 | Gain of constitutively active Yki in ISCs                                                                  | Pertaining to figures 1, 2 and 4; figures S1 and S3 | <i>esg-Gal4, tub-Gal80<sup>ts</sup>, UAS-GFP/+; UAS-Yki<sup>3SA</sup>/+</i><br>( <i>UAS-yki<sup>S111A.S168A.S250A</sup></i> referred to as <i>UAS-Yki<sup>3SA</sup></i> ) |
| 3 | Simultaneous gain of constitutively active Yki ( <i>UAS-Yki<sup>3SA</sup></i> ) and TONDU peptide in ISCs. | Pertaining to figure 2; figure S2                   | <i>esg-Gal4, tub-Gal80<sup>ts</sup>, UAS-GFP/+; UAS-Yki<sup>3SA</sup>/+UAS-vg<sup>TONDU</sup>/+</i>                                                                       |
| 4 | Downregulation of <i>mew</i> in ISCs expressing a constitutively active Yki                                | Pertaining to figure 4                              | <i>esg-Gal4, tub-Gal80<sup>ts</sup>, UAS-GFP/+; UAS-Yki<sup>3SA</sup>/+UAS-mew RNAi/+</i>                                                                                 |
| 5 | Downregulation of <i>rhea</i> in ISCs expressing a constitutively active Yki                               | Pertaining to figure S5                             | <i>esg-Gal4, tub-Gal80<sup>ts</sup>, UAS-GFP/+; UAS-Yki<sup>3SA</sup>/+ UAS-rhea RNAi/+</i>                                                                               |
| 6 | Gain of constitutively active $\beta$ integrin in ISCs.                                                    | Pertaining to figure S5                             | <i>esg-Gal4, tub-Gal80<sup>ts</sup>, UAS-GFP/+; UAS-torso<sup>D</sup>/<math>\beta</math>cyt</i>                                                                           |

**REFERENCES**

- Kwon, Y., Vinayagam, A., Sun, X., Dephoure, N., Gygi, S. P., Hong, P. and Perrimon, N. (2013). The Hippo signaling pathway interactome. *Science* **342**, 737-40.
- Nagaraj, R., Gururaja-Rao, S., Jones, K. T., Slattery, M., Negre, N., Braas, D., Christofk, H., White, K. P., Mann, R. and Banerjee, U. (2012). Control of mitochondrial structure and function by the Yorkie/YAP oncogenic pathway. *Genes Dev* **26**, 2027-37.
- Song, W., Kir, S., Hong, S., Hu, Y., Wang, X., Binari, R., Tang, H. W., Chung, V., Banks, A. S., Spiegelman, B. et al. (2019). Tumor-Derived Ligands Trigger Tumor Growth and Host Wasting via Differential MEK Activation. *Dev Cell* **48**, 277-286 e6.
